# Supplementary material for: Studying the effect of lockdown using epidemiological modelling of COVID-19 and a quantum computational approach using the Ising spin interaction
Source: PubMed Central journal article supplement (PMC7729942; doi:10.1038/s41598-020-78652-0), 2020-12-10
Supplement: 41598_2020_78652_MOESM1_ESM.pdf [file 41598_2020_78652_MOESM1_ESM.pdf]

**A Appendix (On finding the probability distribution function for implementation of Ising model)**

p: The probability of getting infected.

q: The probability of not getting infected i.e.  $q = 1 - p$

Hence, according to binomial distribution,

$$P(X = r) = C_r^S * p^r * q^{S-r}$$

$$\implies P(X = r) = \frac{S!}{(S-r)!r!} \frac{R_0^r}{S^r} \left(1 - \frac{R_0}{S}\right)^{S-r}$$

Assuming the susceptible to be infinite,  $R_0$  is a constant.

$$\begin{aligned} \lim_{S \rightarrow \infty} P(r) &= \lim_{S \rightarrow \infty} \left[ \frac{R_0^r}{r!} \left(1 - \frac{R_0}{S}\right)^S \left(1 - \frac{R_0}{S}\right)^{-r} \frac{S!}{(S)^r (S-r)!} \right] \\ &= \frac{R_0^r}{r!} \lim_{S \rightarrow \infty} \left(1 - \frac{R_0}{S}\right)^S \left(1 - \frac{R_0}{S}\right)^{-r} \frac{S!}{(S)^r (S-r)!} \\ &= \frac{(R_0)^r e^{-R_0}}{r!} \lim_{S \rightarrow \infty} \frac{S!}{(S)^r (S-r)!} \\ &\left( \text{As } \lim_{S \rightarrow \infty} \left(1 - \frac{R_0}{S}\right)^S = e^{-R_0} \right) \end{aligned} \tag{18}$$

Using: Stirling's-approximation-formula i.e.  $S! = \sqrt{2\pi S}e^{-S}S^S$

Then,

$$\begin{aligned}
 \Rightarrow P(r) &= \frac{(R_o)^r e^{-R_o}}{r!} \lim_{S \rightarrow \infty} \frac{\sqrt{2\pi S} e^{-S} S^S}{S^r \sqrt{2\pi(S-r)} e^{-S+r} (S-r)^{S-r}} \\
 &= \frac{(R_o)^r e^{-R_o}}{r!} \lim_{S \rightarrow \infty} \frac{e^{-S+S+0.5} S^{S-r+0.5}}{(S-r)^{S-r+0.5}} \\
 &= \frac{(R_o)^r e^{-R_o}}{r!} e^{-r} \lim_{S \rightarrow \infty} \left(\frac{S}{S-r}\right)^{S-r+0.5} \\
 &= \frac{(R_o)^r e^{-R_o}}{r!} e^{-r} \lim_{S \rightarrow \infty} \frac{1}{\left(1 - \frac{r}{S}\right)^S} \\
 &= \frac{(R_o)^r e^{-R_o}}{r!} e^{-r} e^r \\
 &= \frac{(R_o)^r e^{-R_o}}{r!}
 \end{aligned}$$

## B Appendix (Evolution of $\alpha$ w.r.t. time: An analytical approach)

Considering a process defined by the following parameters:

$r_1(t)$ =probability that a susceptible person becomes infected upon primary contact.

$r_2(t)$ =probability that the next interaction of the susceptible is with an infected person.

$\alpha(t)$ =overall probability that susceptible becomes infected.

N: total population under consideration

S: total number of susceptibles in the given population

In a homogeneous mixing of population ,  $r_2(t) = 1 - \frac{S}{N}$

A random susceptible will come in contact with 'n' individuals in a time interval  $\Delta t$  with a frequency  $\lambda$ .

So, the process is a poisson distribution with a rate of  $\lambda\Delta t$ .

The number of infected persons, 'j' out of these 'n' will have a binomial distribution  $(n, r_2(t))$ ;

Finally,

$$\alpha \propto \sum_{n=0}^{\infty} \frac{e^{-\lambda\Delta t} (\lambda\Delta t)^n}{n!} \left( \sum_{j=0}^{\infty} {}^n C_j (r_2)^j (1-r_2)^{n-j} (r_1)^j \right) \quad (19)$$

Introducing  $r_1 = 1 - r_1'$

$$\alpha \propto \sum_{n=0}^{\infty} \frac{e^{-\lambda\Delta t} (\lambda\Delta t)^n}{n!} \left( \sum_{j=0}^{\infty} {}^n C_j (r_2)^j (1-r_2)^{n-j} (1-r_1')^j \right) \quad (20)$$

For  $z_1 = r_1'(t)$ , a z-transform would result in:

$$\alpha \propto \sum_{n=0}^{\infty} \frac{e^{-\lambda\Delta t} (\lambda\Delta t)^n}{n!} (1 - r_2 r_1')^n \quad (21)$$

For  $z_2 = 1 - r_2 r_1'$ , a z-transform would result in:

$$\alpha = e^{-\lambda\Delta t r_2 r_1'} \quad (22)$$

where  $r_1' = 1 - r_1$

Since time intervals are considerably small, consider

$$\alpha = e^{-c\Delta t} \quad (23)$$

where  $c = -\lambda r_2 r_1'$
